# Supplementary material for: DPP inhibition alters the CXCR3 axis and enhances NK and CD8+ T cell infiltration to improve anti-PD1 efficacy in murine models of pancreatic ductal adenocarcinoma
Source: PubMed Central journal article supplement — J Immunother Cancer. 2021 Nov 4;9(11):e002837. doi: 10.1136/jitc-2021-002837 (PMC8578994; doi:10.1136/jitc-2021-002837), 2021-11-04
Supplement: jitc-2021-002837supp002.pdf [file jitc-2021-002837supp002.pdf]

Supplementary Table 1. Significantly differentially expressed pathways in Pan02 tumors treated with BXCL701 for 2 weeks

| Gene Set Name                                        | # Genes in Gene Set (K) | Description                                                                                         | # Genes in Overlap (k) | k/K    | p-value  | FDR q-value |
|------------------------------------------------------|-------------------------|-----------------------------------------------------------------------------------------------------|------------------------|--------|----------|-------------|
| HALLMARK_INTERFERON_GAMMA_RESPONSE                   | 200                     | Genes up-regulated in response to IFNG [GeneID=3458].                                               | 22                     | 0.11   | 8.17E-25 | 1.70E-21    |
| REACTOME_INNATE_IMMUNE_SYSTEM                        | 1114                    | Innate Immune System                                                                                | 34                     | 0.0305 | 1.14E-19 | 1.18E-16    |
| REACTOME_NEUTROPHIL_DEGRANULATION                    | 479                     | Neutrophil degranulation                                                                            | 22                     | 0.0459 | 1.37E-16 | 9.49E-14    |
| REACTOME_CYTOKINE_SIGNALING_IN_IMMUNE_SYSTEM         | 884                     | Cytokine Signaling in Immune system                                                                 | 27                     | 0.0305 | 9.65E-16 | 5.02E-13    |
| HALLMARK_ALLOGRAFT_REJECTION                         | 200                     | Genes up-regulated during transplant rejection.                                                     | 15                     | 0.075  | 9.42E-15 | 3.92E-12    |
| HALLMARK_INFLAMMATORY_RESPONSE                       | 200                     | Genes defining inflammatory response.                                                               | 12                     | 0.06   | 6.57E-11 | 2.28E-08    |
| REACTOME_SIGNALING_BY_INTERLEUKINS                   | 462                     | Signaling by Interleukins                                                                           | 16                     | 0.0346 | 1.53E-10 | 4.23E-08    |
| REACTOME_CLASS_A_1_RHODOPSIN_LIKE_RECEPTORS_         | 330                     | Class A/1 (Rhodopsin-like receptors)                                                                | 14                     | 0.0424 | 1.63E-10 | 4.23E-08    |
| HALLMARK_INTERFERON_ALPHA_RESPONSE                   | 97                      | Genes up-regulated in response to alpha interferon proteins.                                        | 9                      | 0.0928 | 3.54E-10 | 8.18E-08    |
| REACTOME_GPCR_LIGAND_BINDING                         | 463                     | GPCR ligand binding                                                                                 | 15                     | 0.0324 | 1.46E-09 | 3.03E-07    |
| REACTOME_INTERFERON_GAMMA_SIGNALING                  | 93                      | Interferon gamma signaling                                                                          | 8                      | 0.086  | 6.36E-09 | 1.20E-06    |
| REACTOME_G_ALPHA_I_SIGNALING_EVENTS                  | 403                     | G alpha (i) signalling events                                                                       | 13                     | 0.0323 | 1.98E-08 | 3.43E-06    |
| KEGG_JAK_STAT_SIGNALING_PATHWAY                      | 155                     | Jak-STAT signaling pathway                                                                          | 9                      | 0.0581 | 2.26E-08 | 3.61E-06    |
| HALLMARK_IL6_JAK_STAT3_SIGNALING                     | 87                      | Genes up-regulated by IL6 [GeneID=3569] via STAT3 [GeneID=6774], e.g., during acute phase response. | 7                      | 0.0805 | 9.22E-08 | 1.37E-05    |
| REACTOME_IMMUNOREGULATORY_INTERACTIONS_BETWEEN_A_    | 191                     | Immunoregulatory interactions between a Lymphoid and a non-Lymphoid cell                            | 9                      | 0.0471 | 1.36E-07 | 1.89E-05    |
| BIOCARTA_TCYTOTOXIC_PATHWAY                          | 12                      | T Cytotoxic Cell Surface Molecules                                                                  | 4                      | 0.3333 | 1.47E-07 | 1.91E-05    |
| BIOCARTA_CTL_PATHWAY                                 | 13                      | CTL mediated immune response against target cells                                                   | 4                      | 0.3077 | 2.12E-07 | 2.48E-05    |
| KEGG_CYTOKINE_CYTOKINE_RECEPTOR_INTERACTION          | 265                     | Cytokine-cytokine receptor interaction                                                              | 10                     | 0.0377 | 2.14E-07 | 2.48E-05    |
| REACTOME_INTERFERON_SIGNALING                        | 203                     | Interferon Signaling                                                                                | 9                      | 0.0443 | 2.28E-07 | 2.50E-05    |
| KEGG_PRIMARY_IMMUNODEFICIENCY                        | 35                      | Primary immunodeficiency                                                                            | 5                      | 0.1429 | 3.68E-07 | 3.83E-05    |
| REACTOME_ADAPTIVE_IMMUNE_SYSTEM                      | 818                     | Adaptive Immune System                                                                              | 16                     | 0.0196 | 4.41E-07 | 4.36E-05    |
| REACTOME_GENERATION_OF_SECOND_MESSENGER_MOLECULES    | 39                      | Generation of second messenger molecules                                                            | 5                      | 0.1282 | 6.45E-07 | 6.09E-05    |
| REACTOME_SIGNALING_BY_GPCR                           | 1184                    | Signaling by GPCR                                                                                   | 19                     | 0.016  | 7.07E-07 | 6.39E-05    |
| KEGG_CELL_ADHESION_MOLECULES_CAMS                    | 133                     | Cell adhesion molecules (CAMs)                                                                      | 7                      | 0.0526 | 1.67E-06 | 1.45E-04    |
| BIOCARTA_NEUTROPHIL_PATHWAY                          | 8                       | Neutrophil and Its Surface Molecules                                                                | 3                      | 0.375  | 4.06E-06 | 3.38E-04    |
| BIOCARTA_LYMPHOCYTE_PATHWAY                          | 9                       | Adhesion Molecules on Lymphocyte                                                                    | 3                      | 0.3333 | 6.08E-06 | 4.86E-04    |
| KEGG_T_CELL_RECEPTOR_SIGNALING_PATHWAY               | 108                     | T cell receptor signaling pathway                                                                   | 6                      | 0.0556 | 6.90E-06 | 5.32E-04    |
| BIOCARTA_MONOCYTE_PATHWAY                            | 11                      | Monocyte and its Surface Molecules                                                                  | 3                      | 0.2727 | 1.19E-05 | 8.81E-04    |
| REACTOME_INTERFERON_ALPHA_BETA_SIGNALING             | 71                      | Interferon alpha/beta signaling                                                                     | 5                      | 0.0704 | 1.31E-05 | 9.37E-04    |
| BIOCARTA_THELPER_PATHWAY                             | 12                      | T Helper Cell Surface Molecules                                                                     | 3                      | 0.25   | 1.58E-05 | 1.09E-03    |
| KEGG_CHEMOKINE_SIGNALING_PATHWAY                     | 189                     | Chemokine signaling pathway                                                                         | 7                      | 0.037  | 1.68E-05 | 1.13E-03    |
| KEGG_NEUROACTIVE_LIGAND_RECEPTOR_INTERACTION         | 272                     | Neuroactive ligand-receptor interaction                                                             | 8                      | 0.0294 | 2.21E-05 | 1.44E-03    |
| BIOCARTA_LYM_PATHWAY                                 | 14                      | Adhesion and Diapedesis of Lymphocytes                                                              | 3                      | 0.2143 | 2.59E-05 | 1.63E-03    |
| BIOCARTA_GRANULOCYTES_PATHWAY                        | 15                      | Adhesion and Diapedesis of Granulocytes                                                             | 3                      | 0.2    | 3.23E-05 | 1.98E-03    |
| REACTOME_INTERLEUKIN_2_FAMILY_SIGNALING              | 44                      | Interleukin-2 family signaling                                                                      | 4                      | 0.0909 | 3.63E-05 | 2.16E-03    |
| REACTOME_INTERLEUKIN_10_SIGNALING                    | 46                      | Interleukin-10 signaling                                                                            | 4                      | 0.087  | 4.34E-05 | 2.51E-03    |
| REACTOME_ANTIMICROBIAL_PEPTIDES                      | 97                      | Antimicrobial peptides                                                                              | 5                      | 0.0515 | 5.92E-05 | 3.33E-03    |
| BIOCARTA_COMP_PATHWAY                                | 20                      | Complement Pathway                                                                                  | 3                      | 0.15   | 7.97E-05 | 4.36E-03    |
| REACTOME_INTERLEUKIN_4_AND_INTERLEUKIN_13_SIGNALING  | 111                     | Interleukin-4 and Interleukin-13 signaling                                                          | 5                      | 0.045  | 1.12E-04 | 5.99E-03    |
| REACTOME_TCR_SIGNALING                               | 124                     | TCR signaling                                                                                       | 5                      | 0.0403 | 1.89E-04 | 9.82E-03    |
| REACTOME_PEPTIDE_LIGAND_BINDING_RECEPTORS            | 197                     | Peptide ligand-binding receptors                                                                    | 6                      | 0.0305 | 1.99E-04 | 1.01E-02    |
| KEGG_NATURAL_KILLER_CELL_MEDIATED_CYTOTOXICITY       | 137                     | Natural killer cell mediated cytotoxicity                                                           | 5                      | 0.0365 | 3.00E-04 | 1.48E-02    |
| REACTOME_EXTRACELLULAR_MATRIX_ORGANIZATION           | 301                     | Extracellular matrix organization                                                                   | 7                      | 0.0233 | 3.08E-04 | 1.49E-02    |
| BIOCARTA_IFNA_PATHWAY                                | 9                       | IFN alpha signaling pathway                                                                         | 2                      | 0.2222 | 6.24E-04 | 2.88E-02    |
| REACTOME_OAS_ANTIVIRAL_RESPONSE                      | 9                       | OAS antiviral response                                                                              | 2                      | 0.2222 | 6.24E-04 | 2.88E-02    |
| REACTOME_POST_TRANSLATIONAL_MODIFICATION_SYNTHESIS_C | 94                      | Post-translational modification: synthesis of GPI-anchored proteins                                 | 4                      | 0.0426 | 6.93E-04 | 3.13E-02    |
| BIOCARTA_TCR_PATHWAY                                 | 44                      | T Cell Receptor Signaling Pathway                                                                   | 3                      | 0.0682 | 8.60E-04 | 3.80E-02    |
| REACTOME_INTERLEUKIN_27_SIGNALING                    | 11                      | Interleukin-27 signaling                                                                            | 2                      | 0.1818 | 9.49E-04 | 4.11E-02    |
